# Supplementary material for: PRogram In Support of Moms (PRISM): Development and Beta Testing
Source: Atypon-hosted journal article supplement (doi:10.1176/appi.ps.201600049), 2016-04-15
Supplement: appi.ps.201600049.ds001.pdf [file appi.ps.201600049.ds001.pdf]

**Supplemental Material Table 1. Beta Testing and Focus Group Participants\***

| <b>Participant</b>          | <b>Participants</b>                                                                                                                                                                                                                                                                                                                       | <b>Number<br/>Participants</b> |
|-----------------------------|-------------------------------------------------------------------------------------------------------------------------------------------------------------------------------------------------------------------------------------------------------------------------------------------------------------------------------------------|--------------------------------|
| Working Group Participants  | Attending Ob/Gyn physician (n=1)<br>Ob/Gyn nurse (n=1)<br>Ob/Gyn patient care assistant (n=1)<br>Case manager (n=1)<br>Front desk administrative support staff (n=1)<br>Administrative support staff (n=1)<br>Attending perinatal psychiatrist from the outpatient psychiatry department at the academic medical center (n=1)             | 7                              |
| Beta Testing Participants** | Attending Ob/Gyn physician (n=2)<br>Attending Ob/Gyn resident physicians (supervised by the 2 attending Ob/Gyn physicians participating in beta testing) (n=4)<br>Ob/Gyn nurses (n=3)<br>Ob/Gyn patient care assistant (n=1)<br>Case manager (n=1)<br>Front desk administrative support staff (n=2)<br>Administrative support staff (n=1) | 14                             |
| Focus Group Participants*** | Ob/Gyn resident physicians (n=2)<br>Ob/Gyn nurse (n=1)<br>Ob/Gyn patient care assistant (n=1)<br>Case manager (n=1)<br>Front desk administrative support staff (n=1)<br>Administrative support staff (n=1)                                                                                                                                | 7                              |

\*The practice is staffed with 12 Ob/Gyn attending physicians, 2 nurse practitioners, 20 Ob/Gyn residents that rotate through the clinic, 4 nurses, 1 patient care assistant, and 3 administrative support staff. In fiscal year 2013-2014, the practice site served 691 obstetric patients; among the prenatal care population, approximately 20.4% are Latina, 13.8% are Black, 53.7% are non-Latina white, 5.7% Asian and 6.4% are other race/ethnicities. The practice population was insured by Medicaid (69%), commercially insured (23%), Medicare (4%), and self-pay/free care (4%).

\*\*Except the perinatal psychiatrist, all beta testing participants were also working group participants.

\*\*\*All focus group participants also participated in beta testing.

**Supplemental Material Table 2. Provider Toolkit\***

| Toolkit Component                                                                             | Description                                                                                                                                                                                                                                                                                                                                                               |
|-----------------------------------------------------------------------------------------------|---------------------------------------------------------------------------------------------------------------------------------------------------------------------------------------------------------------------------------------------------------------------------------------------------------------------------------------------------------------------------|
| <a href="#"><u>Depression Screening Algorithm for Obstetric Providers</u></a>                 | Provides guidance for obstetric providers and clinical support staff on administering the EPDS and next steps depending on the EPDS score. The first side is a simplified version of the algorithm. Side two provides more detailed information including talking points and suggested language regarding how to discuss the EPDS and resultant scores with the patients. |
| <a href="#"><u>Bipolar Disorder Screen</u></a>                                                | A brief screen derived from the Composite International Diagnostic Interview-Based Bipolar Disorder Screening Scale to be used prior to starting treatment with an antidepressant.                                                                                                                                                                                        |
| <a href="#"><u>Recommended Steps before Beginning Antidepressant Medication Algorithm</u></a> | Talking points regarding antidepressant use, and the risks of antidepressant use versus . risks of under or no treatment of depression during pregnancy and the postpartum period.                                                                                                                                                                                        |
| <a href="#"><u>Antidepressant Treatment Algorithm</u></a>                                     | Provides a step-by-step guide to prescribing antidepressants, with specific first and second line treatment recommendations and guidelines for ongoing assessment and treatment.                                                                                                                                                                                          |

\*Toolkit documents available upon request
